# Supplementary material for: One-pot synthesis of CuO nanoflower-decorated reduced graphene oxide and its application to photocatalytic degradation of dyes
Source: Royal Society of Chemistry journal article supplement (doi:10.1039/c1cy00374g), 2011-11-02
Supplement: c1cy00374g.pdf [file c1cy00374g.pdf]

## Electronic Supplementary Information

### One-pot synthesis of CuO nanoflower-decorated reduced graphene oxide and its application to photocatalytic degradation of dye

Sen Liu,<sup>a</sup> Jingqi Tian,<sup>a,b</sup> Lei Wang,<sup>a</sup> Yonglan Luo,<sup>a</sup> and Xuping Sun<sup>\*a</sup>

<sup>a</sup> State Key Lab of Electroanalytical Chemistry, Changchun Institute of Applied Chemistry, Chinese Academy of Sciences, Changchun 130022, Jilin, P. R. China

<sup>b</sup> Graduate School of the Chinese Academy of Sciences, Beijing 100039, China

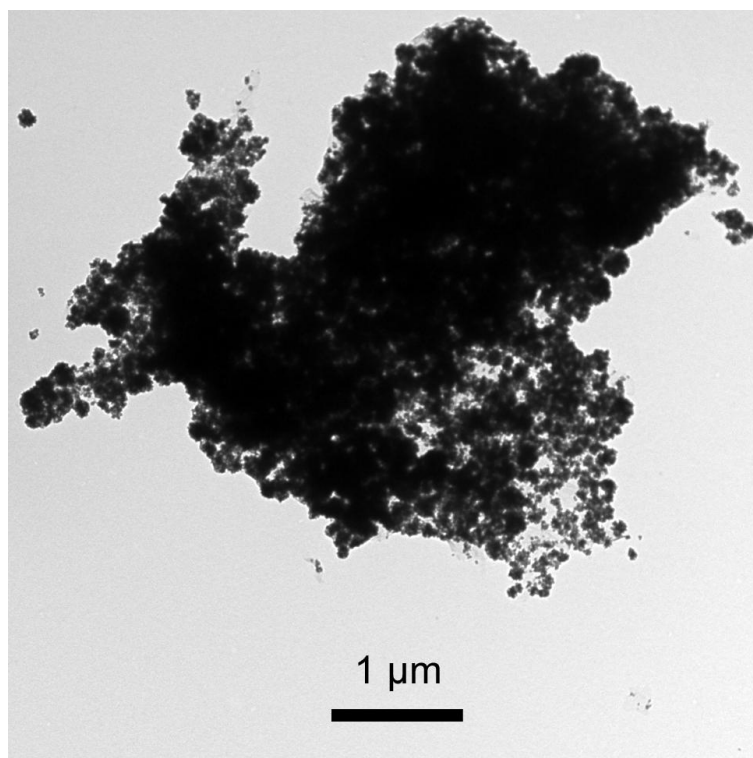

**Fig. S1** The TEM image of the products obtained by heat treatment of the mixture of Cu salts and GO in the absence of PQ11

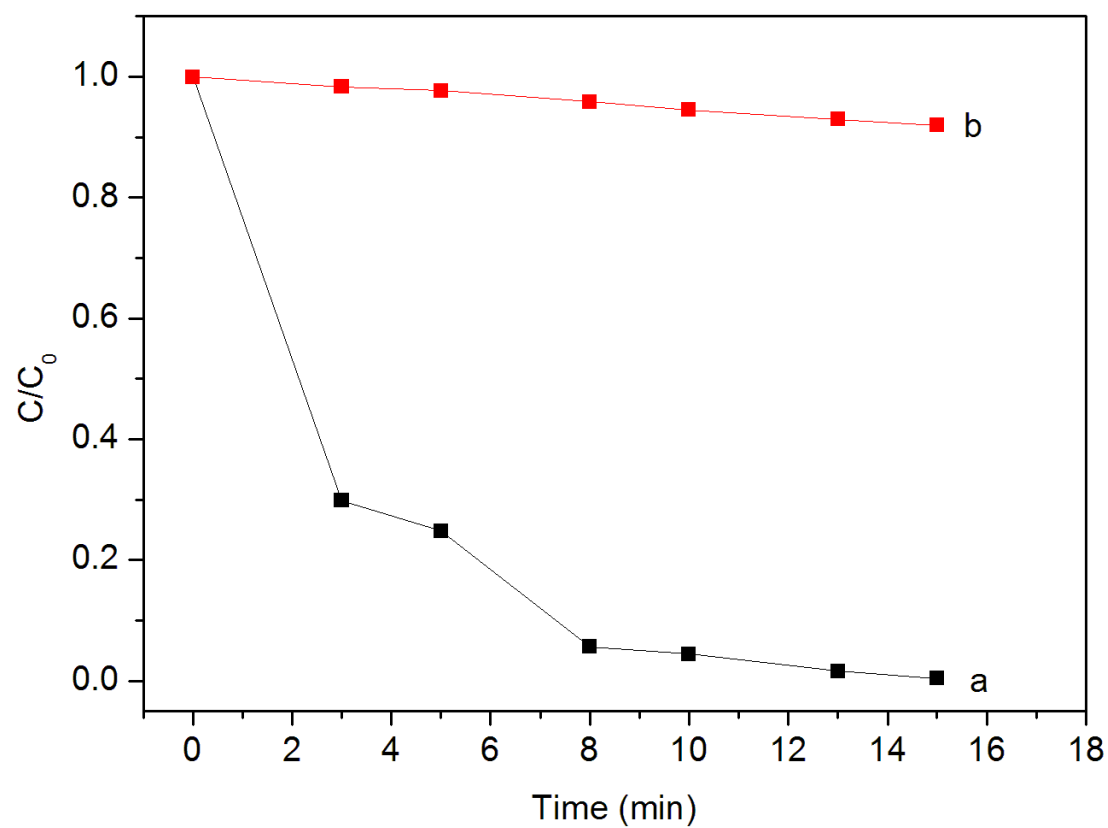

**Fig. S2** Photodegradation of RhB over CuONF/rGO in the presence (a) and in the absence of (b)  $H_2O_2$  under UV light irradiation.
